# Supplementary material
Source: publisher site journal article supplement (https://www.dovepress.com/article/600310)
Supplement: Supplementary file 1 [file 600310%20Revised%20Supplementary%20Tables%20S1-S3.docx]

**Supplementary Table S1: Inter-reader reproducibility of L3 CT-derived body-composition metrics.**

| Metric | ICC | 95% CI of ICC | | Mean bias (A-B) | 95% LoAlow | 95% LoAhigh | CV (%) |
| --- | --- | --- | --- | --- | --- | --- | --- |
| SMI | 0.983 | 0.977 | 0.987 | -0.09 | -3.11 | 2.93 | 2.37 |
| SAI | 0.964 | 0.955 | 0.971 | 0.58 | -7.09 | 8.24 | 2.96 |
| VAI | 0.987 | 0.983 | 0.99 | -0.1 | -1.84 | 1.63 | 2.13 |
| IMAI | 0.978 | 0.97 | 0.983 | 0.02 | -0.67 | 0.71 | 3.53 |

Abbreviations: SMI, skeletal muscle index; SAI, subcutaneous adipose index; VAI, visceral adipose index; IMAI, intramuscular adipose index; ICC, intraclass correlation coefficient; LoA, limits of agreement; CV, coefficient of variation.

**Supplementary Table S2: Bootstrap internal validation of the multivariable logistic regression (B=1000 resamples)**

|  | *B* | *Bias* | *Se* | *P* | *95%CI of OR* | |
| --- | --- | --- | --- | --- | --- | --- |
| Tumor size | -0.42 | -0.034 | 0.17 | 0.006 | -0.831 | -0.149 |
| PLR | -0.008 | -0.001 | 0.005 | 0.039 | -0.018 | 0 |
| RDW | -0.134 | -0.024 | 0.158 | 0.346 | -0.477 | 0.136 |
| PNI | 0.125 | 0.014 | 0.043 | 0.002 | 0.068 | 0.234 |
| SII | -0.001 | 0 | 0.001 | 0.366 | -0.003 | 0.001 |
| SMI | 0.076 | 0.007 | 0.036 | 0.011 | 0.016 | 0.161 |
| VAI | -0.091 | -0.008 | 0.046 | 0.025 | -0.202 | -0.014 |
| Intercept | 1.338 | 0.165 | 3.389 | 0.673 | -5.087 | 8.683 |

**Supplementary Table S3: Comparison of AUCs among the four models.**

|  | Training set | | Test set | |
| --- | --- | --- | --- | --- |
|  | AUC | 95%CI | AUC | 95%CI |
| Nomogram | 0.796 | 0.714-0.878 | 0.751 | 0.618-0.884 |
| Model 1 | 0.608** | 0.506-0.711 | 0.598 | 0.446-0.750 |
| Model 2 | 0.718* | 0.629-0.807 | 0.655 | 0.486-0.823 |
| Model 3 | 0.680** | 0.579-0.781 | 0.693 | 0.557-0.830 |

Model 1, including tumor size. Model 2, incorporating PLR and PNI. Model 3, comprising SMI and VAI.

Abbreviations: SMI, skeletal muscle index; PNI, prognostic nutritional index; VAI, visceral adipose index; PLR, platelet-to-lymphocyte ratio.

**P*<0.05, ***P*<0.01.
